# Supplementary material for: Reciprocal transactivation of Merkel cell polyomavirus and high-risk human papillomavirus promoter activities and increased expression of their oncoproteins
Source: Springer Nature journal article supplement (doi:10.1186/s12985-021-01613-0), 2021-07-03

**Supplementary Figure S1.** Expression of the MCPyV LT and sT mutants. Cells were co-transfected with the empty expression vector pcDNA3.1 (EV) or and expression plasmid for wild type or mutant LT or sT and with a plasmid encoding GFP. Protein expression was monitored using antibodies against MCPyV LT, FLAG (FLAG-tagged sT) and EGFP. EGFP was used to validate for transfection efficiency and GAPDH was used as a loading control. The protein marker (in kDa) is shown in the last lane.

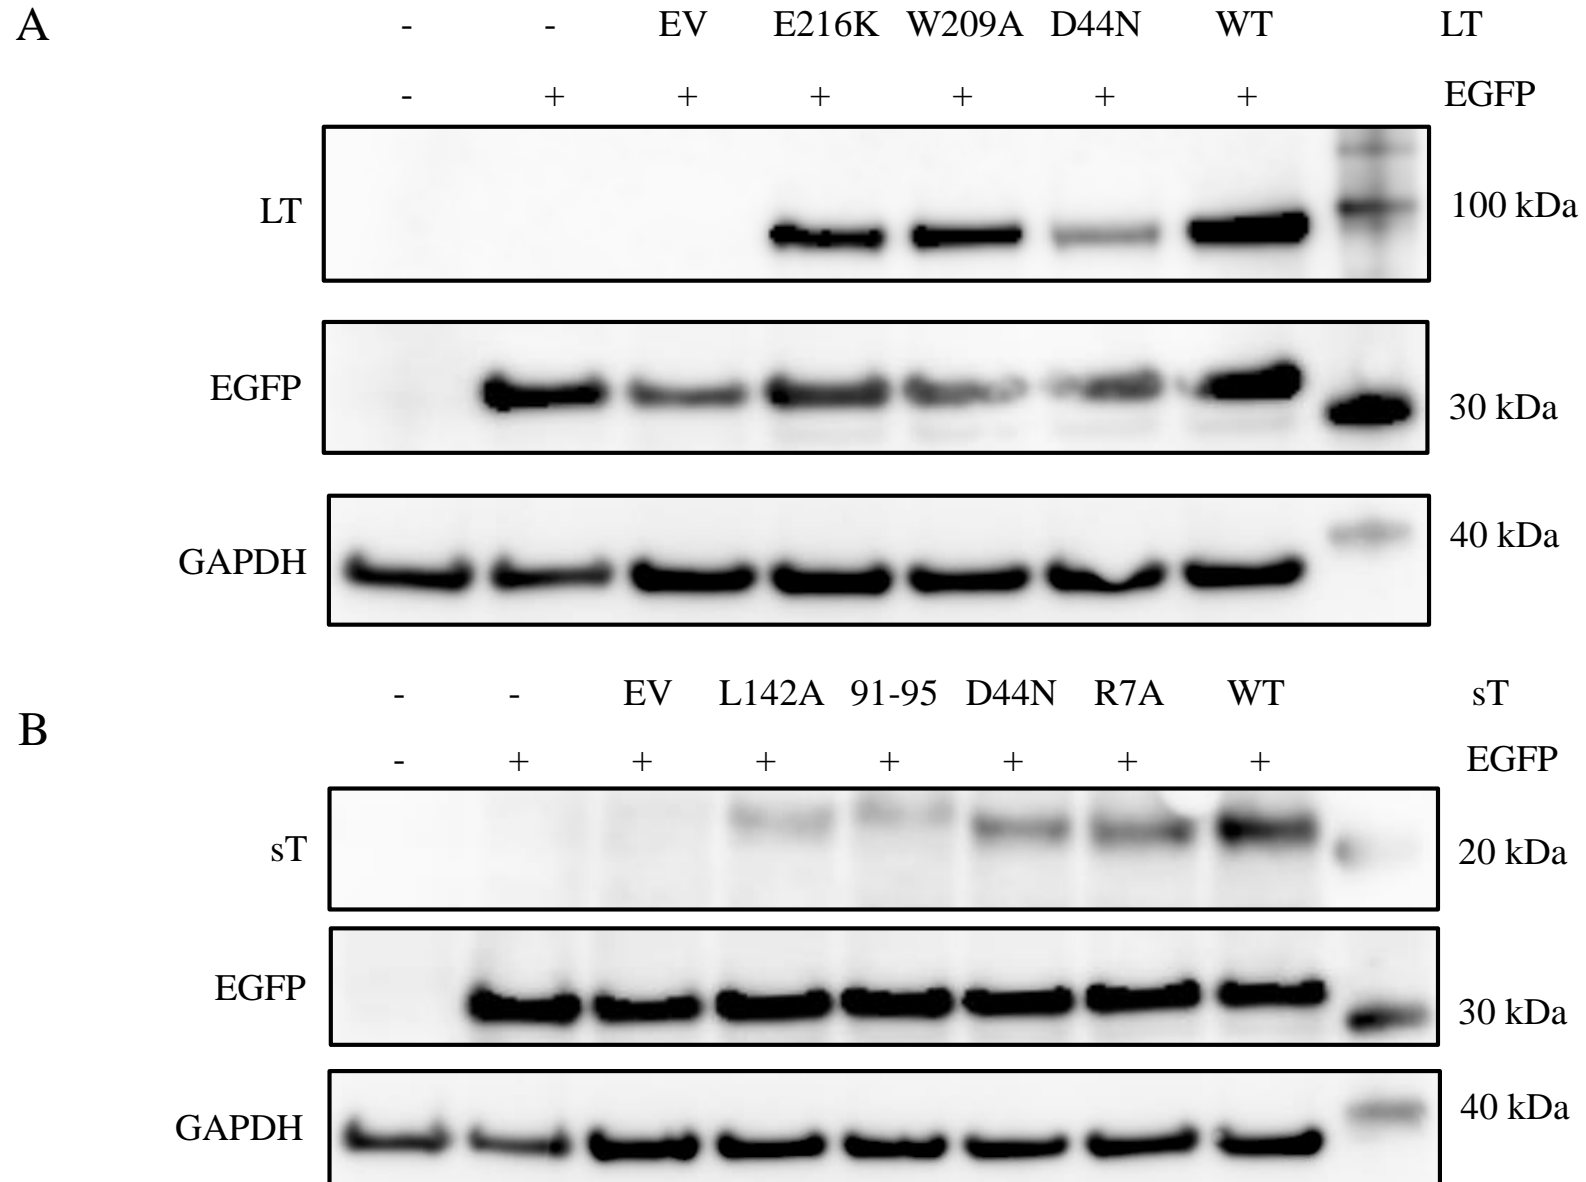

Supplement: MOESM1 [file 19328962]
