# Supplementary material for: Reciprocal transactivation of Merkel cell polyomavirus and high-risk human papillomavirus promoter activities and increased expression of their oncoproteins
Source: Springer Nature journal article supplement (doi:10.1186/s12985-021-01613-0), 2021-07-03
Supplement: MOESM2 [file 19328962]

**Supplementary Figure S2.** Amino acid sequence alignment of the E6 and E7 proteins of HPV16 and HPV18. The amino acids that were mutated in HPV16 E6 and E7 are highlighted and are conserved in HPV18 E6 and E7.

**HPV16 E6 (AYV61474); 158 aa**

MHQKRTAMFQDPQERPGKLPQLCTELQTTIHDIILECVYCKQQLLRREVDFA**F**RDLCIV  
YRDGNPYAVCDKCLKFYISKISEYRHYCYSVYGTTLQYQNKPLCDLLIRCIN**C**QKPLCPE  
EKQRHLDDKKQRFHNIIRGRWTGRCMSSCRSSRTRRETQL

**HPV18 E6 (ATL15239); 158 aa**

MARFEDPTRRPYKLPDLCTELNTSLQDIEITCVYCKTVLELLEVFEF**F**AKDLFVVYRDSI  
PHAACHKCIDFYSRIRELRHYSVYGDITLEKLTNTGLYNLLIRCL**R**CQKPLNPAEKLRLH  
LNEKRRFHNIAGHYRGQCHSCCNRRARQERLQRRRETQV

|       |                                                                       |     |
|-------|-----------------------------------------------------------------------|-----|
| HPV16 | MHQKRTAMFQDPQERPGKLPQLCTELQTTIHDIILECVYCKQQLLRREVDFAFRDLCIV           | 60  |
| HPV18 | -----MARFEDPTRRPYKLPDLCTELNTSLQDIEITCVYCKTVLELLEVFEF <b>F</b> AKDLFVV | 55  |
|       | * *:** .** ***:*****:***:*** : ***** * **::***:** :*                  |     |
| HPV16 | YRDGNPYAVCDKCLKFYISKISEYRHYCYSVYGTTLQYQNKPLCDLLIRCIN <b>C</b> QKPLCPE | 120 |
| HPV18 | YRDSIPHAACHKCIDFYSRIRELRHYSVYGDITLEKLTNTGLYNLLIRCL <b>R</b> CQKPLNPA  | 115 |
|       | ***. *:*.*.**:.***:* * ***. **** ***: * . * :*****:.***** *           |     |
| HPV16 | EKQRHLDDKKQRFHNIIRGRWTGRCMSSCRSSR-----RRETQL 158                      |     |
| HPV18 | EKLRLNEKRRFHNIAGHYRGQCHSCCNRRARQERLQRRRETQV 158                       |     |
|       | ** ***:***:***:***** **:: *:* ***. :* .* :*****                       |     |

**HPV16 E7 (AYV61475), 98 aa**

MHGDTPTLHEYMLDLQPETTD**L**Y**C**Y**E**QLNDSSEEEDEIDGPAGQAEPDRAHYNIVTF**CCK**  
CDSTLRLCVQSTHVDIRTLEDLLMGTGIVCPICSQKP

**HPV18 E7 (ATL15240); 105 aa**

MHGPKATVQDIVLHLEPQNEIPVD**L**L**C**H**E**QLSDSEEENDEIDGVNHQHLPARRAEPQRHT  
LLCM**CCK**CEARIELVVESSADDLRAFQQLFLNTLSFVCPWCASQQ

|       |                                                              |    |
|-------|--------------------------------------------------------------|----|
| HPV16 | MHGDTPTLHEYMLDLQPE---TTDLYCYEQLNDSSEEEDEIDGPAGQAEPDRA---HYN  | 53 |
| HPV18 | MHGPKATVQDIVLHLEPQNEIPVDLLCHEQLSDSEEENDEIDGVNHQHLPARRAEPQRHT | 60 |
|       | *** . ***: :*.***: .** *:* ***.**.*:***** * * * :..          |    |
| HPV16 | IVTFCKCDSTLRLCVQSTHVDIRTLEDLLMGTGIVCPICSQKP 98               |    |
| HPV18 | LLCMCKCEARIELVVESSADDLRAFQQLFLNTLSFVCPWCASQQ 105             |    |
|       | :: :*****: :.* ***: *:*:***:***:***:*** ***:** *:..          |    |
